# Supplementary material for: Novel S. cerevisiae Hybrid Synthetic Promoters Based on Foreign Core Promoter Sequences
Source: MDPI journal article supplement (doi:10.3390/ijms22115704), 2021-05-27
Supplement: s1 [file s1]

**Novel *S. cerevisiae* hybrid synthetic promoters based on foreign core promoter sequences**

**Supplementary Material**

Xiaofan Feng<sup>1</sup> and Mario Andrea Marchisio<sup>1,\*</sup>

<sup>1</sup>School of Pharmaceutical Science and Technology, Tianjin University, 92 Weijin Road, 300072 Tianjin, China

\*corresponding author

**Table S1.** Mean fluorescence expressed by constitutive natural and synthetic yeast promoters SD: standard deviation. Both mean fluorescence values and SD are calculated on three independent measurements.

| Promoter        | Average fluorescence (AU) | SD      |
|-----------------|---------------------------|---------|
| pGPD            | 18390.48                  | 1210.51 |
| pTEF2           | 8063.26                   | 56.68   |
| pTEF1           | 2669.80                   | 106.90  |
| pACT1           | 2650.94                   | 92.96   |
| pCYC1core       | 1481.85                   | 21.23   |
| genCYC1t-       | 937.02                    | 54.86   |
| pCYC1noTATA     |                           |         |
| pCYC1noTATA     | 343.64                    | 25.07   |
| truncated_pCYC1 | 179.19                    | 17.79   |

**Table S2.** Mean fluorescence values from the foreign promoters considered in this work. Each value is the result of three independent experiments. SD: standard deviation.

| Promoter  | Average fluorescence (AU) | SD    |
|-----------|---------------------------|-------|
| pNMT1r    | 419.83                    | 18.82 |
| pCMVfull  | 872.15                    | 14.52 |
| pCMVr     | 272.1                     | 43.61 |
| pSV40full | -11.30                    | -     |
| pSV40r    | -18.30                    | -     |

**Table S3.** Mean fluorescence values expressed by foreign promoters extended with pCYC1noTATA. Each value refers to three independent experiments. SD: standard deviation.

| Promoter       | Average fluorescence (AU) | SD     | Activated TSS | TATA box-TSS distance |
|----------------|---------------------------|--------|---------------|-----------------------|
| MLPcore*       | 4959.87                   | 459.23 | 6             | 44-86                 |
| pNMT1core*     | 3337.97                   | 202.72 | 1             | 116                   |
| pCMVcore*      | 2560.68                   | 196.42 | 6             | 51-93                 |
| pSV40core*     | 2457.5                    | 185.9  | 4             | 91-115                |
| pCAMV35Score*  | 2229.93                   | 372.75 | 6             | 42-84                 |
| pSV40*         | 1900.63                   | 116    | 4             | 91-115                |
| pJB42CAT5core* | 1062.99                   | 82.03  | 4             | 91-115                |
| pTKcore*       | 174.93                    | 1.06   | 6             | 68-110                |

**Table S4.** Mean fluorescence expressed by variants of pSVcore\* after mutating the strong TATA box, TATAAAA. Positions along the TATA box where mutations occurred are indicated in the second column (SD: standard deviation. Both mean fluorescence values and SD are calculated on three independent measurements).

| Group | Mutated Positions | TATA box | Average fluorescence (AU) | SD     |
|-------|-------------------|----------|---------------------------|--------|
| 1     | No mutation       | TATAAAA  | 2457.50                   | 185.90 |
|       | 5                 | TATATAA  | 2368.09                   | 52.14  |
| 2     | 5,7               | TATATAC  | 1448.15                   | 68.88  |
| 3     | 7                 | TATAAAG  | 922.30                    | 63.29  |
| 4     | 7                 | TATAAAT  | 859.54                    | 91.02  |
|       | 7                 | TATAAAC  | 778.31                    | 52.47  |
|       | 6                 | TATAAGA  | 730.16                    | 59.34  |
| 5     | 5,7               | TATATAT  | 599.24                    | 51.56  |
|       | 1                 | CATAAAA  | 566.83                    | 21.25  |
|       | 1                 | AATAAAA  | 553.26                    | 37.22  |
|       | 5,7               | TATATAG  | 526.55                    | 7.56   |
| 6     | 2                 | TTTAAAA  | 485.53                    | 40.62  |
|       | 3                 | TACAAAA  | 470.83                    | 49.78  |
|       | 4                 | TATTAAA  | 455.76                    | 23.99  |
|       | 4,5               | TATCTAA  | 423.41                    | 32.95  |
|       | 6,7               | TATAAGT  | 420.09                    | 40.35  |
|       | 5,6               | TATATTA  | 417.55                    | 48.62  |
|       | 1                 | GATAAAA  | 398.94                    | 45.95  |
|       | 3,7               | TACAAAT  | 387.46                    | 58.21  |
|       | 1,7               | AATAAAT  | 386.95                    | 36.36  |
| 7     | 3                 | TAAAAAA  | 373.79                    | 25.37  |
|       | 1,7               | CATAAAT  | 369.97                    | 19.95  |
|       | 3,5,7             | TAAATAT  | 358.53                    | 17.60  |
| 8     | 2,7               | TTTAAAT  | 332.58                    | 39.81  |
|       | 6                 | TATAATA  | 329.91                    | 13.58  |
|       | 4,7               | TATTAAT  | 264.89                    | 33.20  |

**Table S5.** Average fluorescence expressed by each of the eight groups of synthetic SVcore\* promoter (see Table S4). SD, the standard deviation, is calculated for the groups that contain more than a single promoter.

| <b>Group</b> | <b>Average fluorescence (AU)</b> | <b>SD</b> |
|--------------|----------------------------------|-----------|
| 1            | 2412.80                          | 44.70     |
| 2            | 1448.15                          | -         |
| 3            | 922.30                           | -         |
| 4            | 789.34                           | 53.39     |
| 5            | 561.47                           | 26.18     |
| 6            | 427.39                           | 33.79     |
| 7            | 367.43                           | 6.48      |
| 8            | 309.13                           | 31.30     |

**Table S6.** Effects on the mean fluorescence expressed by synthetic core promoters built on pSVcore\* via single and multiple mutations on the TATA box (see Table S4).

| <b>Mutated position</b> | <b>TATA box</b> | <b>Average<br/>fluorescence (AU)</b> | <b>Relative<br/>fluorescence</b> |
|-------------------------|-----------------|--------------------------------------|----------------------------------|
| No mutation             | TATAAAA         | 2457.50                              | 1.00                             |
| 1                       | CATAAAA         | 566.83                               | 0.23                             |
| 1                       | AATAAAA         | 553.26                               | 0.23                             |
| 1                       | GATAAAA         | 398.94                               | 0.16                             |
| 2                       | TTTAAAA         | 485.53                               | 0.20                             |
| 3                       | TACAAAA         | 470.83                               | 0.19                             |
| 3                       | TAAAAAA         | 373.79                               | 0.15                             |
| 4                       | TATTAAA         | 455.76                               | 0.19                             |
| 5                       | TATATAA         | 2368.09                              | 0.96                             |
| 6                       | TATAAGA         | 730.16                               | 0.30                             |
| 6                       | TATAATA         | 329.91                               | 0.13                             |
| 7                       | TATAAAG         | 922.30                               | 0.38                             |
| 7                       | TATAAAT         | 859.54                               | 0.35                             |
| 7                       | TATAAAC         | 778.31                               | 0.32                             |
| 1,7                     | AATAAAT         | 386.95                               | 0.16                             |
| 1,7                     | CATAAAT         | 369.97                               | 0.15                             |
| 2,7                     | TTTAAAT         | 332.58                               | 0.14                             |
| 3,7                     | TACAAAT         | 387.46                               | 0.16                             |
| 4,7                     | TATTAAT         | 264.89                               | 0.11                             |
| 5,7                     | TATATAC         | 1448.15                              | 0.59                             |
| 5,7                     | TATATAT         | 599.24                               | 0.24                             |
| 5,7                     | TATATAG         | 526.55                               | 0.21                             |
| 6,7                     | TATAAGT         | 420.09                               | 0.17                             |
| 4,5                     | TATCTAA         | 423.41                               | 0.17                             |
| 5,6                     | TATATTA         | 417.55                               | 0.17                             |
| 3,5,7                   | TAAATAT         | 358.53                               | 0.15                             |

**Table S7.** Variation in the mean fluorescence expressed by pSV40\* due to different position of the TATA box (TATATAT) with respect to the TSS. Each fluorescence level is the result of three independent experiments. SD indicates the standard deviation.

| Promoter with distance<br>between TATA box and TSS | Average fluorescence<br>(AU) | SD     |
|----------------------------------------------------|------------------------------|--------|
| pSV40*(TATATAT-29)                                 | 1312.24                      | 240.42 |
| pSV40*(TATATAT-49)                                 | 1305.79                      | 187.30 |
| pSV40*(TATATAT-69)                                 | 1304.11                      | 230.35 |
| pSV40*(TATATAT-39)                                 | 1059.74                      | 87.52  |
| pSV40*(TATATAT-90)                                 | 533.86                       | 30.68  |
| pSV40*(TATATAT-19)                                 | 334.09                       | 45.93  |
| pSV40*(TATATAT+12)                                 | 239.47                       | 51.45  |
| pSV40*(TATATAT-119)                                | 222.19                       | 22.37  |
| pSV40*(TATATAT-129)                                | 169.17                       | 13.14  |

**Table S8.** Effect on fluorescence expression due to different UASs placed 150 nt upstream of the TATA box of pSV40\*(TATATA-49). The strong bipartite UAS from the *GPD* promoter induced the highest increase in fluorescence level. Mean fluorescence and standard deviation (SD) are calculated on three independent measurements.

| Name of promoters            | Average fluorescence<br>(AU) | SD     |
|------------------------------|------------------------------|--------|
| UAS <sub>GPD</sub> (long)    | 3197.30                      | 260.84 |
| UAS <sub>GPD</sub> (40nt)    | 3041.61                      | 57.46  |
| UAS <sub>TEF1</sub> (long)   | 2583.32                      | 284.11 |
| UAS <sub>(FEC)</sub>         | 2871.84                      | 325.33 |
| UAS <sub>TEF1</sub> (RAP1bs) | 2787.17                      | 250.13 |
| UAS <sub>TEF2</sub> (59nt)   | 2155.80                      | 77.75  |
| pSV40(TATATAT-49)            | 1305.79                      | 187.30 |

**Table S9.** Plasmids synthesized, in this work, by Genewiz Inc. Suzhou (China).

| Plasmid name | Construct                                                        |
|--------------|------------------------------------------------------------------|
| pMM861       | pUC57-pSV40*(TATAAAA-90)                                         |
| pMM901       | pUC57-pSV40*(GCGGGGG-90)                                         |
| pMM999       | pUC57-CaMV35Score*                                               |
| pMM1000      | pUC57-pTKcore*                                                   |
| pMM1025      | pUC57-pSV40*(TATATAT-39)                                         |
| pMM1026      | pUC57-pSV40*(TATATAT-90)                                         |
| pMM1027      | pUC57-pSV40*(TATATAT-129)                                        |
| pMM1055      | pUC57-pSV40*(TATATAT+12)                                         |
| pMM1056      | pUC57-pSV40*(TATATAT-19)                                         |
| pMM1057      | pUC57-pSV40*(TATATAT-119)                                        |
| pMM1093      | pUC57-pSV40*(TATATAT-29)                                         |
| pMM1094      | pUC57-pSV40*(TATATAT-49)                                         |
| pMM1095      | pUC57-pSV40*(TATATAT-69)                                         |
| pMM1125      | pUC57-pSV40*-45T                                                 |
| pMM1147      | pUC57-UAS <sub>GPD(40nt)</sub> -150nt-pSV40*(TATAAAA-49)         |
| pMM1152      | pUC57-UAS <sub>GPD(40nt)</sub> -150nt-pSV40*(TATAAAA-49)-<br>45T |

**Table S10.** Plasmids assembled in this work.

| Plasmid name | Construct                                            |
|--------------|------------------------------------------------------|
| pMM863       | pRSII406-pSV40*(TATAAAA)-ATG-HIStag-yEGFP-CYC1t      |
| pMM902       | pRSII406-pSV40*(GCGGGGG)-ATG-HIStag-yEGFP-CYC1t      |
| pMM905       | pRSII406-pSV40core*(TATAAAA)-ATG-HIStag-yEGFP-CYC1t  |
| pMM926       | pRSII406-pMLPcore*-ATG-HIStag-yEGFP-CYC1t            |
| pMM931       | pRSII406- pCMVcore*-ATG-HIStag-yEGFP-CYC1t           |
| pMM944       | pRSII406- pNMT1core*-ATG-HIStag-yEGFP-CYC1t          |
| pMM946       | pRSII406- pJB42CAT5core*-ATG-HIStag-yEGFP-CYC1t      |
| pMM951       | pRSII406-pSV40core*(GCGGGGG)-ATG-HIStag-yEGFP-CYC1t  |
| pMM957       | pRSII406-pSV40core*(AATAAAA)-ATG-HIStag-yEGFP-CYC1t  |
| pMM958       | pRSII406-pCMVcore*(GCGGGGG)-ATG-HIStag-yEGFP-CYC1t   |
| pMM981       | pRSII406-pSV40core*(TAAAAAA)-ATG-HIStag-yEGFP-CYC1t  |
| pMM982       | pRSII406-pSV40core*(TATAAAT)-ATG-HIStag-yEGFP-CYC1t  |
| pMM983       | pRSII406-pSV40 core*(TATATAA)-ATG-HIStag-yEGFP-CYC1t |
| pMM984       | pRSII406-pSV40core*(TATATAT)-ATG-HIStag-yEGFP-CYC1t  |
| pMM985       | pRSII406-MLPcore*(GCGGGGG) -ATG-HIStag-yEGFP-CYC1t   |
| pMM991       | pRSII406-pSV40core*(CATAAAA)-ATG-HIStag-yEGFP-CYC1t  |
| pMM992       | pRSII406-pSV40core*(TACAAAT)-ATG-HIStag-yEGFP-CYC1t  |
| pMM993       | pRSII406-pSV40core*(TATAAGA)-ATG-HIStag-yEGFP-CYC1t  |
| pMM1002      | pRSII406-pSV40core*(TATAAGT)-ATG-HIStag-yEGFP-CYC1t  |
| pMM1003      | pRSII406-pSV40core*(TACAAAA)-ATG-HIStag-yEGFP-CYC1t  |
| pMM1007      | pRSII406-pSV40core*(TAAATAT)-ATG-HIStag-yEGFP-CYC1t  |
| pMM1010      | pRSII406-pCaMV35Score*-ATG-HIStag-yEGFP-CYC1t        |
| pMM1011      | pRSII406-pTKcore*-ATG-HIStag-yEGFP-CYC1t             |
| pMM1012      | pRSII406-pSV40core*(AATAAAT)-ATG-HIStag-yEGFP-CYC1t  |
| pMM1013      | pRSII406-pSV40core*(TTTAAAT)-ATG-HIStag-yEGFP-CYC1t  |
| pMM1014      | pRSII406-pSV40core*(TATTAAA)-ATG-HIStag-yEGFP-CYC1t  |
| pMM1015      | pRSII406-pSV40core*(TATTAAT)-ATG-HIStag-yEGFP-CYC1t  |
| pMM1016      | pRSII406-pSV40core*(CATAAAT)-ATG-HIStag-yEGFP-CYC1t  |
| pMM1028      | pRSII406-pSV40*(TATATAT-39)-ATG-HIStag-yEGFP-CYC1t   |
| pMM1029      | pRSII406-pSV40*(TATATAT-90)-ATG-HIStag-yEGFP-CYC1t   |
| pMM1030      | pRSII406-pSV40*(TATATAT-129)-ATG-HIStag-yEGFP-CYC1t  |
| pMM1033      | pRSII406-pSV40core*(TTTAAAA)-ATG-HIStag-yEGFP-CYC1t  |
| pMM1047      | pRSII406-pSV40core*(TATAAAC)-ATG-HIStag-yEGFP-CYC1t  |
| pMM1048      | pRSII406-pSV40core*(TATAAAG)-ATG-HIStag-yEGFP-CYC1t  |
| pMM1049      | pRSII406-pSV40core*(TATATAC)-ATG-HIStag-yEGFP-CYC1t  |
| pMM1050      | pRSII406-pSV40core*(TATATAG)-ATG-HIStag-yEGFP-CYC1t  |
| pMM1051      | pRSII406-pSV40core*(TATAATA)-ATG-HIStag-yEGFP-CYC1t  |
| pMM1052      | pRSII406-pSV40core*(TATCTAA)-ATG-HIStag-yEGFP-CYC1t  |
| pMM1053      | pRSII406-pSV40core*(TATATTA)-ATG-HIStag-yEGFP-CYC1t  |
| pMM1054      | pRSII406-pSV40core*(GATAAAA)-ATG-HIStag-yEGFP-CYC1t  |



|         |                                                                                       |
|---------|---------------------------------------------------------------------------------------|
| pMM1058 | pRSII406-pSV40*(TATATAT+12)-ATG-HIStag-yEGFP-CYC1t                                    |
| pMM1059 | pRSII406-pSV40*(TATATAT-19)-ATG-HIStag-yEGFP-CYC1t                                    |
| pMM1060 | pRSII406-pSV40*(TATATAT-119)-ATG-HIStag-yEGFP-CYC1t                                   |
| pMM1097 | pRSII406-pSV40*(TATATAT-29)-ATG-HIStag-yEGFP-CYC1t                                    |
| pMM1098 | pRSII406-pSV40*(TATATAT-49)-ATG-HIStag-yEGFP-CYC1t                                    |
| pMM1099 | pRSII406-pSV40*(TATATAT-69)-ATG-HIStag-yEGFP-CYC1t                                    |
| pMM1106 | pRSII406-UAS <sub>GPD(long)</sub> -150nt-pSV40*(TATATAT-49)-ATG-HIStag-yEGFP-CYC1t    |
| pMM1107 | pRSII406-UAS <sub>GPD(40nt)</sub> -150nt-pSV40*(TATATAT-49)-ATG-HIStag-yEGFP-CYC1t    |
| pMM1108 | pRSII406-UAS <sub>TEF2(59nt)</sub> -150nt-pSV40*(TATATAT-49)-ATG-HIStag-yEGFP-CYC1t   |
| pMM1126 | pRSII406-pSV40*-45T-HIStag-yEGFP-CYC1t                                                |
| pMM1127 | pRSII406-UAS <sub>FEC</sub> -150nt-pSV40*(TATATAT-49)-ATG-HIStag-yEGFP-CYC1t          |
| pMM1128 | pRSII406-UAS <sub>TEF1(long)</sub> -150nt-pSV40*(TATATAT-49)-ATG-HIStag-yEGFP-CYC1t   |
| pMM1129 | pRSII406-UAS <sub>TEF1(RAP1bs)</sub> -150nt-pSV40*(TATATAT-49)-ATG-HIStag-yEGFP-CYC1t |
| pMM1161 | pRSII406-UAS <sub>GPD(40nt)</sub> -30nt-MLPcore*-ATG-HIStag-yEGFP-CYC1t               |
| pMM1162 | pRSII406-UAS <sub>GPD(40nt)</sub> -30nt-pSV40*(TATATAT-49)-ATG-HIStag-yEGFP-CYC1t     |
| pMM1163 | pRSII406-UAS <sub>GPD(40nt)</sub> -150nt-pSV40*-45T-ATG-HIStag-yEGFP-CYC1t            |
| pMM1166 | pRSII406-UAS <sub>GPD(40nt)</sub> -30nt-pTKcore*(TATAAAA)-ATG-HIStag-yEGFP-CYC1t      |
| pMM1183 | pRSII406-UAS <sub>GPD(40nt)</sub> -150nt-MLPcore*-ATG-HIStag-yEGFP-CYC1t              |
| pMM1184 | pRSII406-UAS <sub>GPD(40nt)</sub> -150nt-pTKcore*(TATAAAA)-ATG-HIStag-yEGFP-CYC1t     |

---

**Table S11.** Yeast strains engineered in this work.

| Strain name | Genotype              |
|-------------|-----------------------|
| byMM783     | byMM584 pMM863::URA3  |
| byMM868     | byMM584 pMM902::URA3  |
| byMM869     | byMM584 pMM905::URA3  |
| byMM871     | byMM584 pMM951::URA3  |
| byMM872     | byMM584 pMM926::URA3  |
| byMM873     | byMM584 pMM931::URA3  |
| byMM874     | byMM584 pMM944::URA3  |
| byMM876     | byMM584 pMM946::URA3  |
| byMM893     | byMM584 pMM957::URA3  |
| byMM894     | byMM584 pMM958::URA3  |
| byMM900     | byMM584 pMM985::URA3  |
| byMM901     | byMM584 pMM981::URA3  |
| byMM902     | byMM584 pMM982::URA3  |
| byMM903     | byMM584 pMM983::URA3  |
| byMM904     | byMM584 pMM984::URA3  |
| byMM905     | byMM584 pMM991::URA3  |
| byMM906     | byMM584 pMM992::URA3  |
| byMM907     | byMM584 pMM993::URA3  |
| byMM916     | byMM584 pMM1007::URA3 |
| byMM918     | byMM584 pMM1002::URA3 |
| byMM919     | byMM584 pMM1003::URA3 |
| byMM920     | byMM584 pMM1010::URA3 |
| byMM921     | byMM584 pMM1011::URA3 |
| byMM940     | byMM584 pMM1012::URA3 |
| byMM941     | byMM584 pMM1013::URA3 |
| byMM942     | byMM584 pMM1016::URA3 |
| byMM945     | byMM584 pMM1014::URA3 |
| byMM947     | byMM584 pMM1028::URA3 |
| byMM948     | byMM584 pMM1029::URA3 |
| byMM949     | byMM584 pMM1030::URA3 |
| byMM970     | byMM584 pMM1015::URA3 |
| byMM971     | byMM584 pMM1033::URA3 |
| byMM972     | byMM584 pMM1047::URA3 |
| byMM974     | byMM584 pMM1048::URA3 |
| byMM975     | byMM584 pMM1049::URA3 |
| byMM976     | byMM584 pMM1050::URA3 |
| byMM977     | byMM584 pMM1051::URA3 |
| byMM978     | byMM584 pMM1052::URA3 |
| byMM979     | byMM584 pMM1053::URA3 |
| byMM980     | byMM584 pMM1054::URA3 |

|          |                       |
|----------|-----------------------|
| byMM981  | byMM584 pMM1058::URA3 |
| byMM982  | byMM584 pMM1059::URA3 |
| byMM983  | byMM584 pMM1060::URA3 |
| byMM1142 | byMM584 pMM1097::URA3 |
| byMM1143 | byMM584 pMM1098::URA3 |
| byMM1144 | byMM584 pMM1099::URA3 |
| byMM1170 | byMM584 pMM1106::URA3 |
| byMM1171 | byMM584 pMM1107::URA3 |
| byMM1172 | byMM584 pMM1108::URA3 |
| byMM1203 | byMM584 pMM1127::URA3 |
| byMM1204 | byMM584 pMM1126::URA3 |
| byMM1205 | byMM584 pMM1129::URA3 |
| byMM1206 | byMM584 pMM1128::URA3 |
| byMM1230 | byMM584 pMM1161::URA3 |
| byMM1231 | byMM584 pMM1162::URA3 |
| byMM1232 | byMM584 pMM1163::URA3 |
| byMM1254 | byMM584 pMM1166::URA3 |
| byMM1255 | byMM584 pMM1184::URA3 |
| byMM1256 | byMM584 pMM1183::URA3 |

---

## DNA sequences used in this work

Sequences from previously engineered yeast strains. In bold, when available, TATA boxes and TSSs.

### pCMVfull (pMM467; byMM331—putative TSS)

AATTGCATGAAGAATCTGCTTAGGGTTAGGCGTTTTGCGCTGCTTCGCGAT  
GTACGGGGCCAGATATACGCGTTGACATTGATTATTGACTAGTTATTAATAG  
TAATCAATTACGGGGTCATTAGTTCATAGCCCATATATGGAGTTCGCGGTT  
ACATAACTTACGGTAAATGGCCCCGCCTGGCTGACCGCCCAACGACCCCCG  
CCCATTGACGTCAATAATGACGTATGTTCCCATAGTAACGCCAATAGGGA  
CTTTCCATTGACGTCAATGGGTGGACTATTTACGGTAAACTGCCCACTTGG  
CAGTACATCAAGTGTATCATATGCCAAGTACGCCCCCTATTGACGTCAAT  
GACGGTAAATGGCCCCGCCTGGCATTATGCCCAGTACATGACCTTATGGGA  
CTTTCCTACTTGGCAGTACATCTACGTATTAGTCATCGCTATTACCATGGT  
GATGCGGTTTTTGGCAGTACATCAATGGGCGTGGATAGCGGTTTGACTCAC  
GGGGATTTCGAAGTCTCCACCCCATTTGACGTCAATGGGAGTTTGTTTTGGC  
ACCAAAATCAACGGGACTTTCCAAAATGTCGTAACAACTCCGCCCCATTG  
ACGCAAATGGGCGGTAGGCGTGTACGGTGGGAGGTCTATATAAGCAGAG  
CTCTCTGGCTAACTAGAGAACCCACTGCTTACTGGCTTATCGAAATTAATA  
CGACTCACTATAGGGAGACCCAAGCTGGCTAGTT

**pCMVr (pMM331; byMM134)**

GTAGGCGTG TACGGTGGGAGGTCTATATAAGCAGAGCTCGTTT TAGTGAAC  
CGTCAGATCGCCTGGAGACGCCATCCACGCTGTTTTGACCTCCATAATA

**pSV40full (pMM291; byMM205)**

GGAGCTGTGGAATGTGTGTCAGTTAGGGTGTGGAAAGTCCCCAGGCTCCC  
CAGCAGGCAGAAGTATGCAAAGCATGCATCTCAATTAGTCAGCAACCAGG  
TGTGGAAAGTCCCCAGGCTCCCCAGCAGGCAGAAGTATGCAAAGCATGCA  
TCTCAATTAGTCAGCAACCATAGTCCCGCCCCTAACTCCGCCCATCCCGCC  
CCTAACTCCGCCCAGTTCCGCCCATTCTCCGCCCCATGGCTGACTAATTTT  
TTTTATTTATGCAGAGGCCGAGGCCGCCTCTGCCTCTGAGCTATTCCAGA  
AGTAGTGAGGAGGCTTTTTTGGAGGCCTAGGCTTTTGCAAAAAGCTC

**pSV40r (pMM328; byMM131)**

TGCATCTCAATTAGTCAGCAACCAGGTGTGGAAAGTCCCCAGGCTCCCCA  
GCAGGCAGAAGTATGCAAAGCATGCATCTCAATTAGTCAGCAACCATAGT  
CCCGCCCCTAACTCCGCCCATCCCGCCCCTAACTCCGCCCAGTTCCGCCCCA  
TTCTCCGCCCCATGGCTGACTAATTTTTTTTATTTATGCAGAGGCCGAGGC  
CGCTCTGCCTCTGAGCTATTCCAGAAGTAGTGAGGAGGCTTTTTTGGAG  
GCCTAGGCTTTTGCAAAAAGCTC

**pNMT1r (pMM338; byMM143)**

AAACATTGAAGATATATAAAGGAAGAGGAATCCTGGCATATCATCAATT  
GAATAAGTTGAATTAATTATTTCAATCTCATTCTCACTTTCTGACTTATAGT  
CGCTTTGTAAATTGGC

Sequences used to assemble plasmids in this work.

**pCYC1noTATA**

TTCTTTCCTTATACATtAGGACCTTTGCAGCATAAATTACTATACTTCTATA  
GACACA CAAACACAAATACACACACTAAATTAATA

**ATG-HISTtag-yEGFP**

ATGAGCCATCATCATCATCACAGCGGATCCTCTAAAGGTGAAGAATT  
ATTCAGTGGTGTGTGCCAATTTTGGTTGAATTAGATGGTGATGTTAATGG  
TCACAAATTTTCTGTCTCCGGTGAAGGTGAAGGTGATGCTACTTACGGTAA  
ATTGACCTTAAAATTTATTTGTACTACTGGTAAATTGCCAGTTCCATGGCC  
AACCTTAGTCACTACTTTTCGGTTATGGTGTTCATGTTTTGCGAGATACCC

AGATCATATGAAACAACATGACTTTTTTCAAGTCTGCCATGCCAGAAGGTT  
ATGTTCAAGAAAGAACTATTTTTTTTCAAAGATGACGGTAACTACAAGACC  
AGAGCTGAAGTCAAGTTTGAAGGTGATACCTTAGTTAATAGAATCGAATT  
AAAAGGTATTGATTTTAAAGAAGATGGTAACATTTTAGGTCACAAATTGG  
AATACAACCTATAACTCTCACAATGTTTACATCATGGCTGACAAACAAAAG  
AATGGTATCAAAGTTAACTTCAAAATTAGACACAACATTGAAGATGGTTC  
TGTTCAATTAGCTGACCATTATCAACAAAATACTCCAATTGGTGATGGTCC  
AGTCTTGTTACCAGACAACCATTACTTATCCACTCAATCTGCCTTATCCAA  
AGATCCAAACGAAAAGAGAGACCACATGGTCTTGTTAGAATTTGTTACTG  
CTGCTGGTATTACCCATGGTATGGATGAATTGTACAAATAA

### **CYC1t**

CATGTAATTAGTTATGTCACGCTTACATTCACGCCCTCCCCCACATCCGC  
TCTAACCGAAAAGGAAGGAGTTAGACAACCTGAAGTCTAGGTCCCTATTT  
ATTTTTTTTATAGTTATGTTAGTATTAAGAACGTTATTTATATTTCAAATTTT  
TCTTTTTTTTCTGTACAGACGCGTGTACGCATGTAAACATTATACTGAAAAC  
CTTGCTTGAGAAGGTTTTTGGGACGCTCGAAGGCTTTAATTTGCAAGCTATC

### **pSV40 (original template)**

TGCATCTCAATTAGTCAGCAACCATAGTCCCGCCCCTAACTCCGCCCATCC  
CGCCCCTAACTCCGCCCAGTTCCGCCCATTCTCCGCCCCATCGCTGACTAA  
TTTTTTTTTATTTATGCAGAGGCCGAGGCCGCCTCGGCCTCTGAGCTATTCC  
AGAAGTAGTGAGCAGGCTTTTTTGGCGACCTAGGCTT

### **pSV40core (original template)**

TATTTATGCAGAGGCCGAGGCCGCCTCGGCCTCTGAGCTATTCCAGAAGT  
AGTGAGCAGGCTTTTTTGGCGACCTAGGCTT

### **pSV40-45T**

GCATCTCAATTAGTCAGCAACCATAGTCCCGCCCCTAACTCCGCCCATCCC  
GCCCCTAACTCCGCCCAGTTCCGCCCCTTTTTTTTTTTTTTTTATTCTCCGCCC  
CATCGCTGACTAATTTTTTTTGCAGAGGCCGTTTTTTTTTTTTTTTTTAGGCCGC  
CTCGGCCTCTGAGCTTTTTTTTTTTTTTTTATTCCAGAATATATATGTAGTGAG  
CAGGCTTTTTTGGCGACCTAGGCTT

### **MLPcore**

TATAAAAGGGGGTGGGGGCGTTCGTCCTCACTCT

### **pCMVcore**

TATATAAGCACAGCTCGTTTAGTGAACCGTCAGATCGCCTG

**pNMT1core**

TATATAAAGGAAGAGGAATCCTGGCATATCATCAATTGAATAAGTTGAAT  
TAATTATTTCAATCTCATTCTCACTTTCTGACTTATAGTCGCTTTGTAAAT  
GGCC

**pJB42CAT5core**

TATAAAAGCTTGGGGCTGGGGCCGAGCACTGGGGACTTTGAGGGTGGCC  
AGGCCAGCGTAGGAGGCCAGCGTA<sub>c</sub>GATCCTG

**pCaMV35Score**

CAAGACCCTTCCTCTATATAAGGAAGTTCATTTCAATTTGGAGAGGA

**pTKcore**

ATATTAAGGTGACGCGTGTGGCCTCGAACACCGAGCGACCCTGCAGCGAC  
CCGCTTAA

**UAS<sub>GPD(long)</sub>**

CAGTTCGAGTTTATCATTATCAATACTGCCATTTCAAAGAATACGTAAATA  
ATTAATAGTAGTGATTTTCCTAACTTTATTTAGTCAAAAAATTAGCCTTTT  
AATTCTGCTGTAACCCGTACATGCCCAAAATAGGGGGCGGGTTACACAGA  
ATATATAACATCGTAGGTGTCTGGGTGAACAGTTTATTCCTGGCATCCACT  
AAATATAATGGAGCCCGCTTTTAAAGCTGGCATCCAGAAAAAAAAAAGAAT  
CCCAGCACCAAAATATTGTTTTCTTCACCAACCATCAGTTCATAGGTCCAT  
TCTCTTAGCGCAACTACAGAGAACAGGGGCACAAACAGGCAAAAAACGG  
GCACAACCTCAATGGAGTGATGCAACCTGCCTGGAGTAAATGATGACACA  
AGGCAATTGACCCACGCATGTATCTATCTCATTTTCTTACACCTTCTATTA  
CCTTCTGCTCTCTCTGATTTGGAAAAAGCTGAAAAAAAAAGGTTGAAACCA  
GTTCCCTGAAATTATTCCCCTACTTGAC

**UAS<sub>GPD(40nt)</sub>**

GTAGGTGTCTGGGTGAACAGTTTATTCCTGGCATCCACTA

**UAS<sub>TEF2(59nt)</sub>**

AAACTACCTCCGTACATTCATGTTGCACCCACACATTTATACACCCAGACC  
GCGACAAA

**UAS<sub>FEC</sub>**

CCTCCTTGAAACTGAAATTTTAGCATGTGA

### UAS<sup>TEF1(long)</sup>

ATAGCTTCAAAATGTTTCTACTCCTTTTTTACTCTTCCAGATTTTCTCGGAC  
TCCGCGCATCGCCGTACCACTTCAAAACACCCAAGCACAGCATACTAAAT  
TTCCCCTCTTTCTTCCTCTAGGGTGTCGTTAATTACCCGTACTAAAGGTTTG  
GAAAAGAAAAAAGAGACCGCCTCGTTTCTTTTTCTTCGTCGAAAAAGGCA  
ATAAAAATTTT

### UAS<sup>TEF1(RAP1bs)</sup>

CTTCAAaaCACCCAAGCACagCATACt

## FIGURES

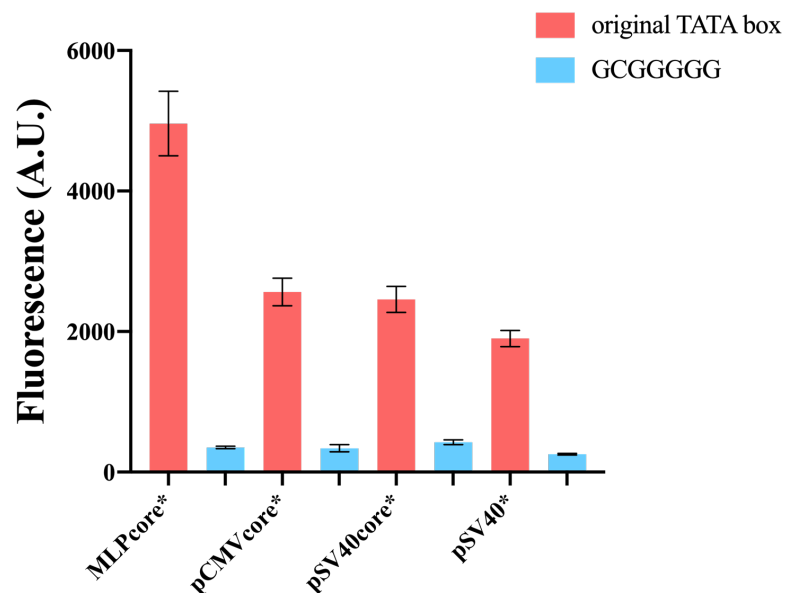

**Figure S1.** Reduction in the mean fluorescence expression due to the substitution of the original TATA box, of four of our new synthetic promoters, with the heptamer GCGGGGG. The mean fluorescence values in the presence of GCGGGGG are (in A.U.): 349.94 (MLPcore\*); 339.91 (pCMVcore\*); 425.28 (pSV40core\*); and 253.65 (pSV40\*). It is reasonable to assume that they are due to pCYC1noTATA, whose mean fluorescence amounts to 343.64 A.U. (see Table S1) and can be attributed to leakage. Each average value comes from three independent experiments.

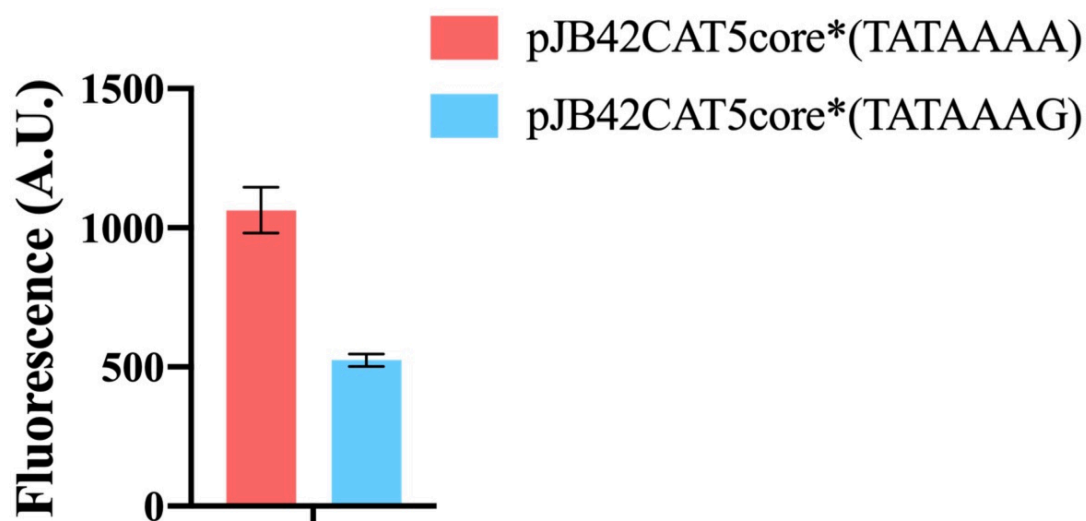

**Figure S2.** Effect on the mean fluorescence, expressed by the synthetic core promoter pJB42CAT5core\*, due to a G → A mutation at position 7 of the TATA box. Each average value comes from three independent experiments.

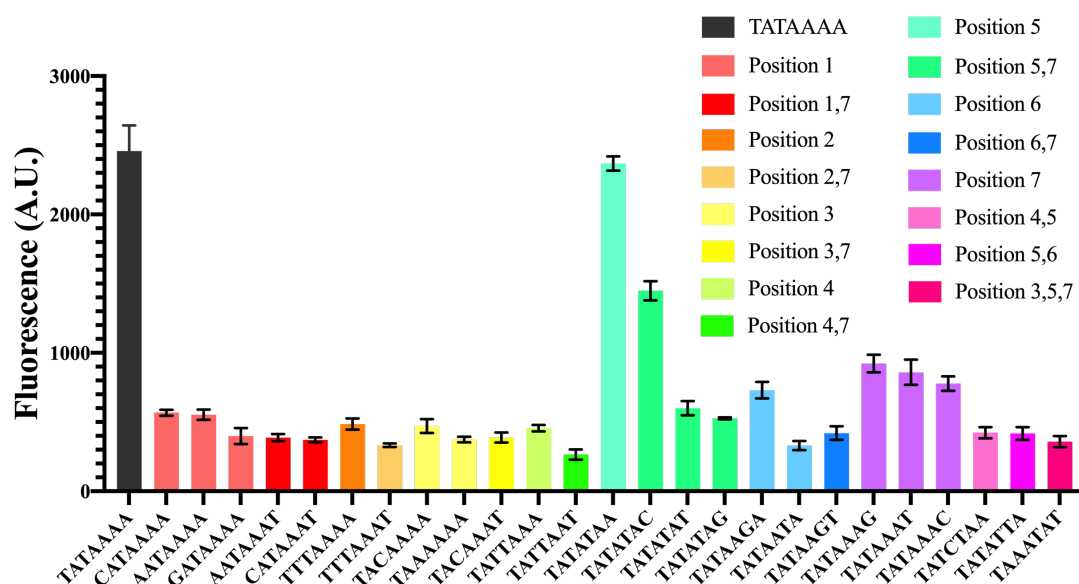

**Figure S3.** Variation in the mean fluorescence expressed from the synthetic pSV40core\* due to one or multiple mutations along the strong TATA box—TATAAAA. Each average value comes from three independent experiments.



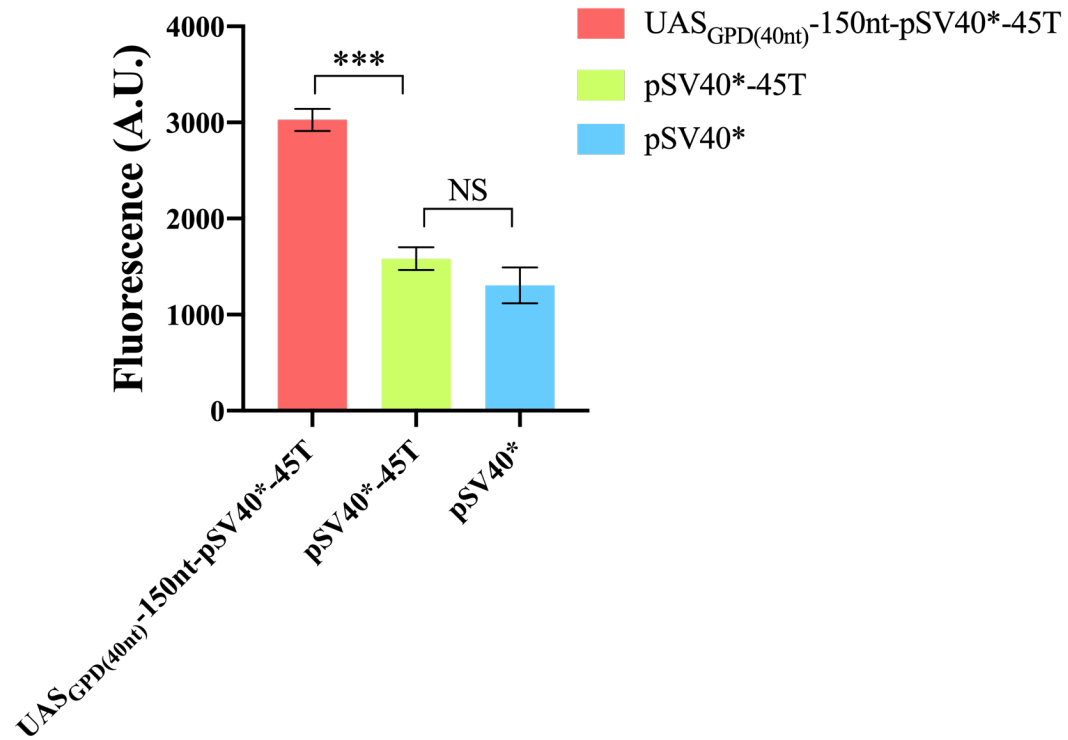

**Figure S4.** Mean fluorescence expressed by pSV40\* variant containing three islands of 15 thymines each for nucleosome removal. Only the addition of the strong UAS<sub>GPD(40nt)</sub> 150 nt upstream of the TATA box contributed to an enhancement in the promoter strength. The variant of pSV40\*-45T showed no significant difference in statistical terms from the original pSV40\* (NS, p-value = 0.1096). “\*\*\*\*” corresponds to a p-value < 0.001, two-sided Welch’s t-test.
